# Supplementary material for: Sensitive determination of natamycin based on a new voltammetric sensor: a single-walled carbon nanotube composite poly(l-serine) film modified electrode
Source: Royal Society of Chemistry journal article supplement (doi:10.1039/c4ay02964j), 2015-01-01
Supplement: c4ay02964j1.pdf [file c4ay02964j1.pdf]

### Supplementary Figures and Table

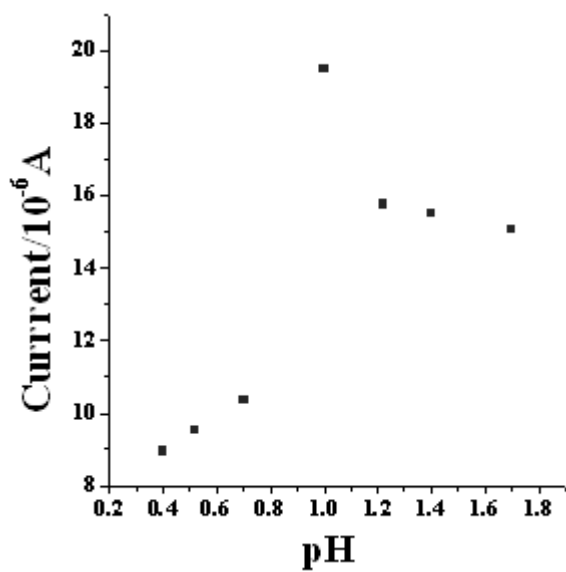

Fig. 1 Dependence of the oxidation peak current of  $5 \times 10^{-6}$  mol L<sup>-1</sup> natamycin on pH.

Table 1 Influence of possible interference species on the peak current of  $1 \times 10^{-6}$  mol L<sup>-1</sup> natamycin.

| Interference ion       | Ratio of ion and iodide | Single change(%) |
|------------------------|-------------------------|------------------|
| Ca <sup>2+</sup>       | 200                     | 1.6              |
| Cu <sup>2+</sup>       | 200                     | 1.8              |
| Mg <sup>2+</sup>       | 200                     | 3.7              |
| Mn <sup>2+</sup>       | 200                     | 4.2              |
| Fe <sup>2+</sup>       | 200                     | 2.0              |
| Glucose                | 50                      | 2.3              |
| Sucrose                | 50                      | 2.6              |
| Amylum                 | 50                      | 3.4              |
| Citrate acid           | 50                      | 1.9              |
| Sodium citrate         | 50                      | 3.6              |
| Oxalic acid            | 50                      | 2.8              |
| Vitamin E              | 50                      | 2.9              |
| Vitamin B <sub>2</sub> | 50                      | 1.9              |
| Edetate disodium       | 50                      | -2.8             |
| Vitamin C              | 50                      | -3.2             |
| Benzoic acid           | 50                      | 3.4              |
| Sodium benzoate        | 50                      | -2.3             |
| Sodium sorbate         | 50                      | -3.7             |
| Methylparaben          | 50                      | -3.8             |
